# Supplementary material for: Nano delivery of MiR-146a and its Effect Study on Genes Involved in Apoptosis and Autophagy Pathways in Lung Cancer and Tuberculosis
Source: Research Square preprint supplement (doi:10.21203/rs.3.rs-6454179/v1), 2025-05-06
Supplement: Supplementary file 1 [file 9f348dcde4361da68a6691fc.docx]

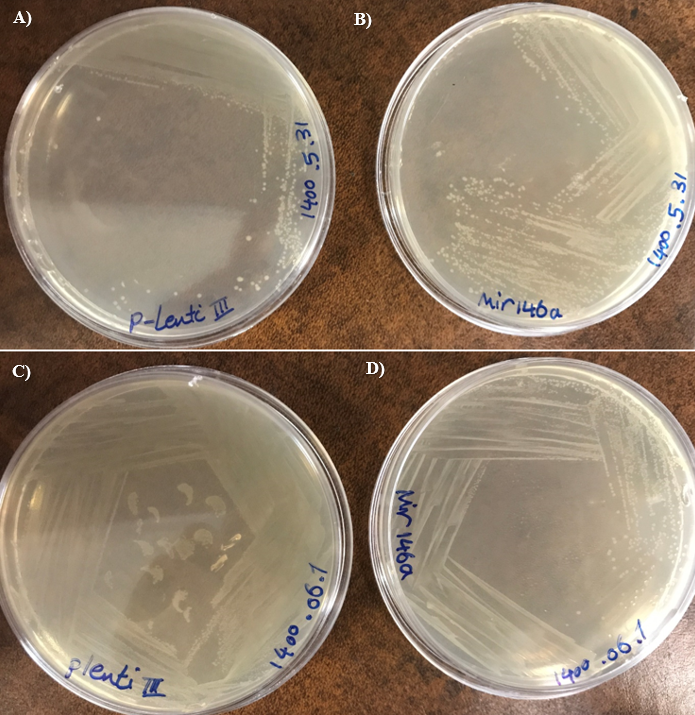


**S1.** Cultivation of A and C) MOC pLentiIII, and B and D) miR-146a vectors.

**S2.** OD results of plasmid extraction by Nanodrop device.

| Figure | OD | Vector |
| --- | --- | --- |
| 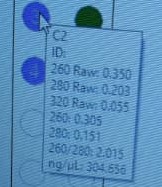 | 304.65 ng/ µl | MOC pLentiIII |
| 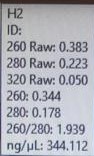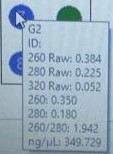 | A: 344.112 ng/ µl  B:349.72 ng/ µl | MOC pLentiIII |
| 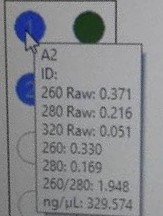 | 329.57 ng/ µl | MOC pLentiIII |
| 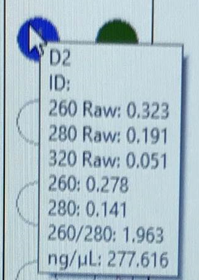 | 277.61 ng/ µl | MOC pLentiIII |  |
| 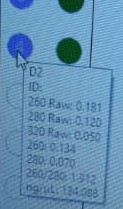 | 134.08 ng/ µl | MiR-146a |
| 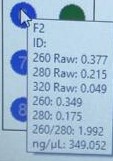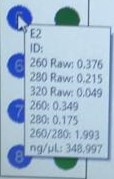 | A: 349.05 ng/ µl  B:348.997 ng/ µl | MiR-146a |
| 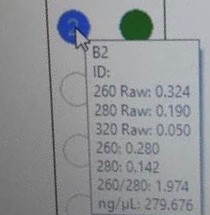 | 279.67 ng/ µl | MiR-146a |
| 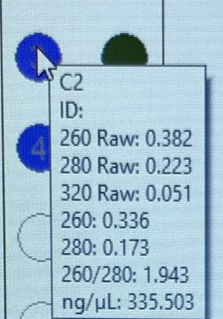 | 335.50 ng/ µl | MiR-146a |
